# Supplementary material for: Registered report: Inhibition of BET recruitment to chromatin as an effective treatment for MLL-fusion leukemia
Source: eLife. 2015 Sep 1;4:e08997. doi: 10.7554/eLife.08997 (PMC4552956; doi:10.7554/eLife.08997)
Supplement: Supplementary file 1. — DOI: http://dx.doi.org/10.7554/eLife.08997.002 [file elife08997s001.xlsx]

## Sheet: Sheet1
	SCORE 0	SCORE 1	SCORE 2	SCORE 3
Activity	Normal	Mild decreased	Moderately decreased	Stationary unless stimulated
Posture	Normal	Hunch noted only at rest	Hunching apparent	Severe hunching/ impaired movement
Fur Texture	Normal	Mild ruffling	Moderate ruffling	Severe ruffling/poor grooming
Weight Loss	No	<10%	>10% to <25%	>25%
Limb Paralysis	No	No	No	Yes
	SCORE 0	SCORE 1	SCORE 2	SCORE 3
Activity	Normal	Mild decreased	Moderately decreased	Stationary unless stimulated
Posture	Normal	Hunch noted only at rest	Hunching apparent	Severe hunching/ impaired movement
Fur Texture	Normal	Mild ruffling	Moderate ruffling	Severe ruffling/poor grooming
Weight Loss	No	<10%	>10% to <25%	>25%
Limb Paralysis	No	No	No	Yes
